# Supplementary material for: Accounting for sex differences in PTSD: A multi-variable mediation model
Source: PubMed Central journal article supplement (PMC4300366; doi:10.3402/ejpt.v6.26068), 2015-01-19
Supplement: EJPT-6-26068-s004.pdf [file EJPT-6-26068-s004.pdf]

## **Accounting for sex differences in PTSD: A multi-variable mediation model**

Dorte Mølgaard Christiansen, Maj Hansen

Międzyplciowe różnice w podatności na PTSD: wielozmiennowy model mediacyjny

Wprowadzenie: Średnio dwa razy więcej kobiet w porównaniu do mężczyzn otrzymuje diagnozę PTSD. Jednakże niewiele wiadomo, dlaczego tak się dzieje. Wcześniejsze badania na ten temat wykorzystywały modele mediacyjne identyfikujące czynniki ryzyka odpowiedzialne za powyższy stan, które jednak nie do końca dobrze były przystosowane do badanej problematyki.

Cel: Celem niniejszego badania było przetestowanie hipotezy na temat tego, czy pre- około i potraumatyczne czynniki ryzyka, które występują częściej u kobiet, mogą być odpowiedzialne za różnice międzyplciowe w podatności na PTSD. Metoda: Badanie to miało charakter quasi-

prospektywny i kwestionariuszowy i miało na celu określenie natężenia PTSD i powiązanych z tym zaburzeniem czynników ryzyka w grupie 73.3% wszystkich duńskich pracowników banku, którzy eksponowani byli na napady na banki w okresie od kwietnia 2010 r. do kwietnia 2011 r.

Badani wypełniali kwestionariusze 1 tydzień (T1, N=450) oraz 6 miesięcy po napadzie (T2, N=368; 61,11% kobiet). Wykorzystano wielowymiarowy model mediacyjny. Wyniki: Wśród kobiet odnotowano wyższe nasilenie PTSD, wyższy poziom neurotyczności, depresji, zaabsorbowania lękowego, okołotraumatycznego strachu, poczucia horroru i bezsilności, tonicznego zneruchomienia, paniki, dysocjacji, negatywnych potraumatycznych przekonań na temat siebie i świata i poczucia osamotnienia. Wszystkie te zmienne, potraktowane jako mediatory, wyjaśniały 83% związku pomiędzy płcią a PTSD. Konkluzje: Wyniki niniejszych badań wskazują, że wśród kobiet notuje się wyższe nasilenie objawów PTSD z uwagi na częstsze występowanie u nich różnorodnych czynników ryzyka, prowadzących do tego zaburzenia. Wyniki niniejszych badań mogą posłużyć również za próbę wyjaśnienia występowania wyższej częstości innych zaburzeń u kobiet, jak zaburzeń afektywnych i lękowych.

Słowa kluczowe: zaburzenie po stresie traumatycznym; różnice międzyplciowe; wielozmiennowa mediacja; czynniki ryzyka; predyktory; napad; przemoc interpersonalna.

Name of translator: Marcin Rzeszutek, University of Finance and Management in Warsaw, Poland

Citation: European Journal of Psychotraumatology 2015, 6: 26068 - <http://dx.doi.org/10.3402/ejpt.v6.26068>
